# Supplementary material
Source: publisher figshare collection journal article supplement (https://frontiersin.figshare.com/ndownloader/files/25322594)
Supplement: Supplementary file 1 [file 25322594]

**Table of Content Entry**


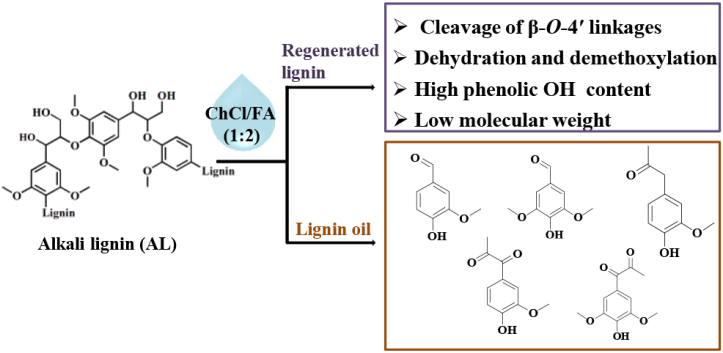


Unravelling the structural transformation of lignin during DES pretreatment
